# Supplementary material for: Diagnostic and prognostic value of WNT family gene expression in hepatitis B virus-related hepatocellular carcinoma
Source: PubMed Central journal article supplement — Oncol Rep. 2019 Jul 5;42(3):895–910. doi: 10.3892/or.2019.7224 (PMC6667889; doi:10.3892/or.2019.7224), 2019-07-05
Supplement: Supplementary_Data.pdf [file Supplementary_Data.pdf]

Figure S1. WNT signaling pathway map.

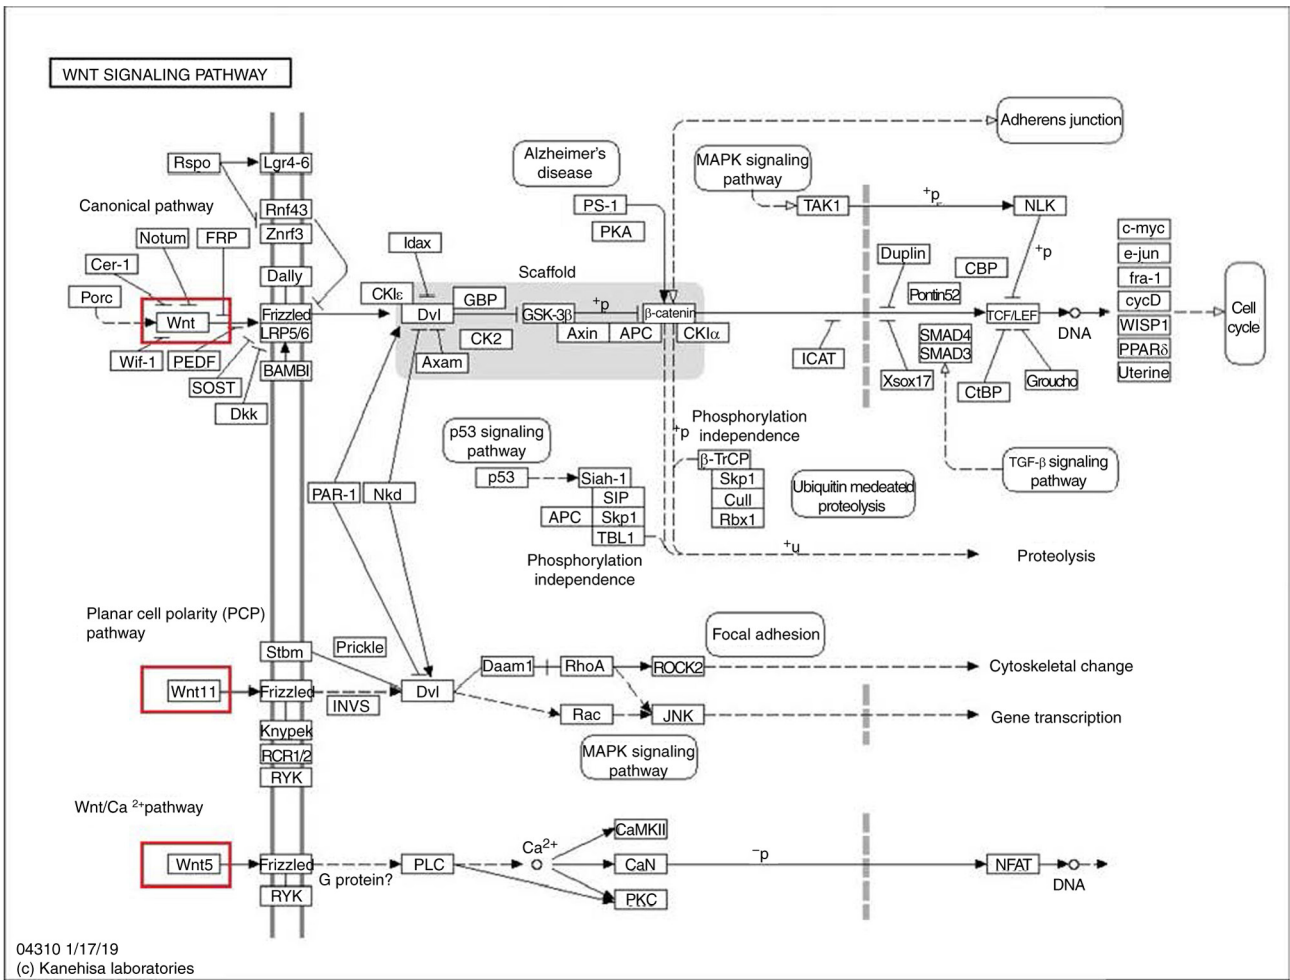



Table SI. Clinical characteristics of HBV-related HCC patients in GSE14520 cohort.

| Variables                          | Patients<br>(n=212) | OS               |                 |                          |         | RFS              |                 |                         |         |
|------------------------------------|---------------------|------------------|-----------------|--------------------------|---------|------------------|-----------------|-------------------------|---------|
|                                    |                     | No. of<br>events | MST<br>(months) | HR<br>(95% CI)           | P-value | No. of<br>events | MRT<br>(months) | HR<br>(95% CI)          | P-value |
| <b>Sex</b>                         |                     |                  |                 |                          |         |                  |                 |                         |         |
| Female                             | 29                  | 8                | NA              | 1                        |         | 10               | NA              | 1                       |         |
| Male                               | 183                 | 74               | NA              | 1.704<br>(0.821-3.534)   | 0.152   | 106              | 40              | 2.143<br>(1.120-4.100)  | 0.021   |
| <b>Age (years)</b>                 |                     |                  |                 |                          |         |                  |                 |                         |         |
| ≤60                                | 175                 | 69               | NA              | 1                        |         | 96               | 45              | 1                       |         |
| >60                                | 37                  | 13               | NA              | 0.864<br>(0.478-1.564)   | 0.630   | 20               | 48              | 0.974<br>(0.602-1.578)  | 0.916   |
| <b>ALT (U/l)</b>                   |                     |                  |                 |                          |         |                  |                 |                         |         |
| ≤50                                | 124                 | 46               | NA              | 1                        |         | 63               | 53              | 1                       |         |
| >50                                | 88                  | 36               | NA              | 1.095<br>(0.708-1.693)   | 0.684   | 53               | 40              | 1.241<br>(0.861-1.788)  | 0.248   |
| <b>AFP (ng/ml)<sup>a</sup></b>     |                     |                  |                 |                          |         |                  |                 |                         |         |
| ≤300                               | 115                 | 39               | NA              | 1                        |         | 62               | 48              | 1                       |         |
| >300                               | 94                  | 43               | NA              | 1.546<br>(1.002-2.385)   | 0.049   | 54               | 35              | 1.200<br>(0.833-1.728)  | 0.328   |
| <b>Cirrhosis</b>                   |                     |                  |                 |                          |         |                  |                 |                         |         |
| No                                 | 17                  | 2                | NA              | 1                        |         | 5                | NA              | 1                       |         |
| Yes                                | 195                 | 80               | NA              | 4.335<br>(1.065-17.638)  | 0.041   | 111              | 37              | 2.612<br>(1.066-6.402)  | 0.036   |
| <b>Tumor size (cm)<sup>b</sup></b> |                     |                  |                 |                          |         |                  |                 |                         |         |
| ≤5                                 | 137                 | 46               | NA              | 1                        |         | 73               | 51              | 1                       |         |
| >5                                 | 74                  | 36               | 53              | 1.975<br>(1.274-3.060)   | 0.002   | 43               | 28              | 1.409<br>(0.966-2.056)  | 0.075   |
| <b>Number of nodules</b>           |                     |                  |                 |                          |         |                  |                 |                         |         |
| Single                             | 167                 | 59               | NA              | 1                        |         | 90               | 49              | 1                       |         |
| Multiple                           | 45                  | 23               | 47              | 1.607<br>(0.992-2.604)   | 0.054   | 26               | 28              | 1.216<br>(0.785-1.883)  | 0.382   |
| <b>BCLC stage</b>                  |                     |                  |                 |                          |         |                  |                 |                         |         |
| 0                                  | 20                  | 2                | NA              | 1                        |         | 6                | NA              | 1                       |         |
| A                                  | 143                 | 48               | NA              | 4.119<br>(1.001-16.951)  | 0.050   | 74               | 51              | 2.050<br>(0.892-4.711)  | 0.091   |
| B                                  | 22                  | 12               | 46              | 8.992<br>(2.005-40.320)  | 0.004   | 15               | 26              | 4.019<br>(1.550-10.421) | 0.004   |
| C                                  | 27                  | 20               | 13              | 18.993<br>(4.419-81.632) | <0.001  | 21               | 8               | 6.163<br>(2.477-15.333) | <0.001  |
| <b>TNM stage</b>                   |                     |                  |                 |                          |         |                  |                 |                         |         |
| I                                  | 89                  | 20               | NA              | 1                        |         | 35               | NA              | 1                       |         |
| II                                 | 76                  | 32               | NA              | 2.214<br>(1.265-3.873)   | 0.005   | 48               | 28              | 1.995<br>(1.289-3.088)  | 0.002   |
| III                                | 47                  | 30               | 18              | 5.197<br>(2.930-9.218)   | <0.001  | 33               | 18              | 3.220<br>(1.993-5.204)  | <0.001  |

<sup>a</sup>Information on AFP was unavailable in 3 patients. <sup>b</sup>Information on tumor size was unavailable in 1 patient. HBV, hepatitis B virus; HCC, hepatocellular carcinoma; OS, overall survival; RFS, recurrence-free survival; MST, median survival time; MRT, median recurrence time; ALT, alanine aminotransferase; AFP,  $\alpha$ -fetoprotein; BCLC, Barcelona Clinic Liver Cancer; TNM, tumor-node-metastasis; HR, hazard ratio; CI, confidence interval; NA, not available.

Table SII. Gene Ontology (GO) terms of WNT family genes.

| Category         | Term                                                                                                 | Count | %           | P-value  | Genes                                                                                                                            |
|------------------|------------------------------------------------------------------------------------------------------|-------|-------------|----------|----------------------------------------------------------------------------------------------------------------------------------|
| GOTERM_BP_DIRECT | GO:0045165, cell fate commitment                                                                     | 17    | 0.534591195 | 7.97E-41 | WNT5A, WNT10A, WNT16, WNT10B, WNT5B, WNT2B, WNT2, WNT1, WNT7B, WNT4, WNT3, WNT9B, WNT11, WNT9A, WNT6, WNT7A, WNT8B               |
| GOTERM_BP_DIRECT | GO:0016055, Wnt signaling pathway                                                                    | 19    | 0.597484277 | 3.01E-36 | WNT5A, WNT10A, WNT16, WNT10B, WNT5B, WNT3A, WNT2B, WNT2, WNT1, WNT7B, WNT4, WNT3, WNT9B, WNT11, WNT9A, WNT6, WNT7A, WNT8A, WNT8B |
| GOTERM_BP_DIRECT | GO:0030182, neuron differentiation                                                                   | 17    | 0.534591195 | 4.41E-35 | WNT5A, WNT10A, WNT16, WNT10B, WNT5B, WNT3A, WNT2B, WNT2, WNT7B, WNT4, WNT3, WNT9B, WNT11, WNT9A, WNT6, WNT8A, WNT8B              |
| GOTERM_BP_DIRECT | GO:0060070, canonical Wnt signaling pathway                                                          | 14    | 0.440251572 | 3.29E-27 | WNT5A, WNT10B, WNT3A, WNT2B, WNT2, WNT1, WNT7B, WNT4, WNT3, WNT9B, WNT11, WNT9A, WNT7A, WNT8A                                    |
| GOTERM_BP_DIRECT | GO:0071300, cellular response to retinoic acid                                                       | 12    | 0.377358491 | 8.99E-23 | WNT5A, WNT2, WNT7B, WNT10B, WNT3, WNT5B, WNT3A, WNT9B, WNT11, WNT9A, WNT6, WNT8A, WNT8B                                          |
| GOTERM_BP_DIRECT | GO:0007275, multicellular organism development                                                       | 15    | 0.471698113 | 1.75E-18 | WNT5A, WNT10A, WNT16, WNT10B, WNT5B, WNT2B, WNT2, WNT1, WNT7B, WNT4, WNT9B, WNT11, WNT9A, WNT6, WNT8A                            |
| GOTERM_BP_DIRECT | GO:0090263, positive regulation of canonical Wnt signaling pathway                                   | 7     | 0.220125786 | 2.03E-09 | WNT2, WNT1, WNT4, WNT10B, WNT3A, WNT7A, WNT2B                                                                                    |
| GOTERM_BP_DIRECT | GO:0060021, palate development                                                                       | 6     | 0.188679245 | 1.36E-08 | WNT5A, WNT3A, WNT9B, WNT11, WNT7A, WNT8A                                                                                         |
| GOTERM_BP_DIRECT | GO:0061303, cornea development in camera-type eye                                                    | 4     | 0.125786164 | 5.77E-08 | WNT9B, WNT9A, WNT6, WNT2B                                                                                                        |
| GOTERM_BP_DIRECT | GO:0061180, mammary gland epithelium development                                                     | 4     | 0.125786164 | 5.77E-08 | WNT2, WNT7B, WNT4, WNT3                                                                                                          |
| GOTERM_BP_DIRECT | GO:0071560, cellular response to transforming growth factor beta stimulus                            | 5     | 0.157232704 | 1.90E-07 | WNT5A, WNT2, WNT10A, WNT4, WNT7A                                                                                                 |
| GOTERM_BP_DIRECT | GO:0071425, hematopoietic stem cell proliferation                                                    | 4     | 0.125786164 | 3.74E-07 | WNT5A, WNT1, WNT10B, WNT2B                                                                                                       |
| GOTERM_BP_DIRECT | GO:1904886, beta-catenin destruction complex disassembly                                             | 4     | 0.125786164 | 1.57E-06 | WNT1, WNT3A, WNT8A, WNT8B                                                                                                        |
| GOTERM_BP_DIRECT | GO:0061184, positive regulation of dermatome development                                             | 3     | 0.094339623 | 3.25E-06 | WNT1, WNT4, WNT3A                                                                                                                |
| GOTERM_BP_DIRECT | GO:0010628, positive regulation of gene expression                                                   | 6     | 0.188679245 | 6.46E-06 | WNT10A, WNT16, WNT3, WNT3A, WNT11, WNT6                                                                                          |
| GOTERM_BP_DIRECT | GO:1904954, canonical Wnt signaling pathway involved in midbrain dopaminergic neuron differentiation | 3     | 0.094339623 | 6.50E-06 | WNT2, WNT1, WNT3                                                                                                                 |
| GOTERM_BP_DIRECT | GO:002062, chondrocyte differentiation                                                               | 4     | 0.125786164 | 9.23E-06 | WNT10B, WNT5B, WNT7A, WNT2B                                                                                                      |
| GOTERM_BP_DIRECT | GO:0045893, positive regulation of transcription, DNA-templated                                      | 7     | 0.220125786 | 1.10E-05 | WNT5A, WNT1, WNT4, WNT3A, WNT11, WNT6, WNT7A                                                                                     |

Table SII. Continued.

| Category         | Term                                                                                           | Count | %           | P-value     | Genes                      |
|------------------|------------------------------------------------------------------------------------------------|-------|-------------|-------------|----------------------------|
| GOTERM_BP_DIRECT | GO:0001658, branching involved in ureteric bud morphogenesis                                   | 4     | 0.125786164 | 1.16E-05    | WNT1, WNT4, WNT9B, WNT6    |
| GOTERM_BP_DIRECT | GO:0045599, negative regulation of fat cell differentiation                                    | 4     | 0.125786164 | 1.16E-05    | WNT5A, WNT1, WNT10B, WNT3A |
| GOTERM_BP_DIRECT | GO:1904953, Wnt signaling pathway involved in midbrain dopaminergic neuron differentiation     | 3     | 0.094339623 | 1.62E-05    | WNT5A, WNT1, WNT3A         |
| GOTERM_BP_DIRECT | GO:0033278, cell proliferation in midbrain                                                     | 3     | 0.094339623 | 1.62E-05    | WNT2, WNT1, WNT3A          |
| GOTERM_BP_DIRECT | GO:0070307, lens fiber cell development                                                        | 3     | 0.094339623 | 2.27E-05    | WNT7B, WNT5B, WNT7A        |
| GOTERM_BP_DIRECT | GO:0061072, iris morphogenesis                                                                 | 3     | 0.094339623 | 4.86E-05    | WNT2, WNT9A, WNT2B         |
| GOTERM_BP_DIRECT | GO:0060071, Wnt signaling pathway, planar cell polarity pathway                                | 4     | 0.125786164 | 1.22E-04    | WNT5A, WNT1, WNT9B, WNT11  |
| GOTERM_BP_DIRECT | GO:0051091, positive regulation of sequence-specific DNA binding transcription factor activity | 4     | 0.125786164 | 1.81E-04    | WNT2, WNT1, WNT10B, WNT3A  |
| GOTERM_BP_DIRECT | GO:0048843, negative regulation of axon extension involved in axon guidance                    | 3     | 0.094339623 | 3.47E-04    | WNT5A, WNT3, WNT3A         |
| GOTERM_BP_DIRECT | GO:0035115, embryonic forelimb morphogenesis                                                   | 3     | 0.094339623 | 5.28E-04    | WNT3, WNT9A, WNT7A         |
| GOTERM_BP_DIRECT | GO:0020888, lens development in camera-type eye                                                | 3     | 0.094339623 | 5.62E-04    | WNT5A, WNT2, WNT2B         |
| GOTERM_BP_DIRECT | GO:0001837, epithelial to mesenchymal transition                                               | 3     | 0.094339623 | 5.97E-04    | WNT5A, WNT4, WNT11         |
| GOTERM_BP_DIRECT | GO:0090090, negative regulation of canonical Wnt signaling pathway                             | 4     | 0.125786164 | 6.58E-04    | WNT5A, WNT4, WNT5B, WNT11  |
| GOTERM_BP_DIRECT | GO:0032526, response to retinoic acid                                                          | 3     | 0.094339623 | 8.68E-04    | WNT9B, WNT8A, WNT8B        |
| GOTERM_BP_DIRECT | GO:0009267, cellular response to starvation                                                    | 3     | 0.094339623 | 0.001140139 | WNT4, WNT9B, WNT2B         |
| GOTERM_BP_DIRECT | GO:0048146, positive regulation of fibroblast proliferation                                    | 3     | 0.094339623 | 0.0015026   | WNT5A, WNT2, WNT1          |
| GOTERM_BP_DIRECT | GO:0045669, positive regulation of osteoblast differentiation                                  | 3     | 0.094339623 | 0.001851502 | WNT7B, WNT4, WNT10B        |
| GOTERM_BP_DIRECT | GO:0007416, synapse assembly                                                                   | 3     | 0.094339623 | 0.001913051 | WNT5A, WNT3A, WNT7A        |
| GOTERM_BP_DIRECT | GO:0048697, positive regulation of collateral sprouting in absence of injury                   | 2     | 0.062893082 | 0.002142793 | WNT3, WNT3A                |
| GOTERM_BP_DIRECT | GO:0072174, metanephric tubule formation                                                       | 2     | 0.062893082 | 0.002142793 | WNT4, WNT9B                |
| GOTERM_BP_DIRECT | GO:0061317, canonical Wnt signaling pathway involved in cardiac muscle cell fate commitment    | 2     | 0.062893082 | 0.002142793 | WNT3A, WNT8A               |
| GOTERM_BP_DIRECT | GO:0060775, planar cell polarity pathway involved in gastrula mediolateral intercalation       | 2     | 0.062893082 | 0.002142793 | WNT5A, WNT11               |
| GOTERM_BP_DIRECT | GO:0007267, cell-cell signaling                                                                | 4     | 0.125786164 | 0.002359008 | WNT2, WNT1, WNT9B, WNT9A   |
| GOTERM_BP_DIRECT | GO:0030324, lung development                                                                   | 3     | 0.094339623 | 0.002951142 | WNT5A, WNT2, WNT7B         |
| GOTERM_BP_DIRECT | GO:0003408, optic cup formation involved in camera-type eye development                        | 2     | 0.062893082 | 0.003212562 | WNT5A, WNT16               |
| GOTERM_BP_DIRECT | GO:0060492, lung induction                                                                     | 2     | 0.062893082 | 0.003212562 | WNT2, WNT2B                |
| GOTERM_BP_DIRECT | GO:0060638, mesenchymal-epithelial cell signaling                                              | 2     | 0.062893082 | 0.003212562 | WNT5A, WNT2B               |
| GOTERM_BP_DIRECT | GO:0022009, central nervous system vasculogenesis                                              | 2     | 0.062893082 | 0.004281249 | WNT7B, WNT7A               |
| GOTERM_BP_DIRECT | GO:1904861, excitatory synapse assembly                                                        | 2     | 0.062893082 | 0.004281249 | WNT5A, WNT7A               |

Table SII. Continued.

| Category         | Term                                                                                   | Count | %           | P-value     | Genes                           |
|------------------|----------------------------------------------------------------------------------------|-------|-------------|-------------|---------------------------------|
| GOTERM_BP_DIRECT | GO:0021871, forebrain regionalization                                                  | 2     | 0.062893082 | 0.004281249 | WNT7B, WNT2B                    |
| GOTERM_BP_DIRECT | GO:0048570, notochord morphogenesis                                                    | 2     | 0.062893082 | 0.004281249 | WNT5A, WNT11                    |
| GOTERM_BP_DIRECT | GO:0003402, planar cell polarity pathway involved in axis elongation                   | 2     | 0.062893082 | 0.004281249 | WNT5A, WNT11                    |
| GOTERM_BP_DIRECT | GO:0008584, male gonad development                                                     | 3     | 0.094339623 | 0.004474791 | WNT5A, WNT4, WNT2B              |
| GOTERM_BP_DIRECT | GO:0061038, uterus morphogenesis                                                       | 2     | 0.062893082 | 0.005348853 | WNT9B, WNT7A                    |
| GOTERM_BP_DIRECT | GO:0072201, negative regulation of mesenchymal cell proliferation                      | 2     | 0.062893082 | 0.005348853 | WNT5A, WNT11                    |
| GOTERM_BP_DIRECT | GO:0045836, positive regulation of meiotic nuclear division                            | 2     | 0.062893082 | 0.005348853 | WNT5A, WNT4                     |
| GOTERM_BP_DIRECT | GO:0060028, convergent extension involved in axis elongation                           | 2     | 0.062893082 | 0.006415376 | WNT5A, WNT11                    |
| GOTERM_BP_DIRECT | GO:1902474, positive regulation of protein localization to synapse                     | 2     | 0.062893082 | 0.006415376 | WNT5A, WNT7A                    |
| GOTERM_BP_DIRECT | GO:0048341, paraxial mesoderm formation                                                | 2     | 0.062893082 | 0.006415376 | WNT5A, WNT11                    |
| GOTERM_BP_DIRECT | GO:2000049, positive regulation of cell-cell adhesion mediated by cadherin             | 2     | 0.062893082 | 0.007480818 | WNT5A, WNT3A                    |
| GOTERM_BP_DIRECT | GO:0000578, embryonic axis specification                                               | 2     | 0.062893082 | 0.007480818 | WNT1, WNT7A                     |
| GOTERM_BP_DIRECT | GO:1904948, midbrain dopaminergic neuron differentiation                               | 2     | 0.062893082 | 0.008545182 | WNT2, WNT9B                     |
| GOTERM_BP_DIRECT | GO:0090037, positive regulation of protein kinase C signaling                          | 2     | 0.062893082 | 0.008545182 | WNT5A, WNT11                    |
| GOTERM_BP_DIRECT | GO:0036465, synaptic vesicle recycling                                                 | 2     | 0.062893082 | 0.008545182 | WNT3A, WNT7A                    |
| GOTERM_BP_DIRECT | GO:0072089, stem cell proliferation                                                    | 2     | 0.062893082 | 0.008545182 | WNT7B, WNT3                     |
| GOTERM_BP_DIRECT | GO:0040037, negative regulation of fibroblast growth factor receptor signaling pathway | 2     | 0.062893082 | 0.010670676 | WNT5A, WNT4                     |
| GOTERM_BP_DIRECT | GO:0007411, axon guidance                                                              | 3     | 0.094339623 | 0.012341195 | WNT5A, WNT3, WNT3A              |
| GOTERM_BP_DIRECT | GO:0008284, positive regulation of cell proliferation                                  | 4     | 0.125786164 | 0.012705871 | WNT2, WNT1, WNT10B, WNT3A       |
| GOTERM_BP_DIRECT | GO:0021846, cell proliferation in forebrain                                            | 2     | 0.062893082 | 0.012791867 | WNT3A, WNT7A                    |
| GOTERM_BP_DIRECT | GO:0060317, cardiac epithelial to mesenchymal transition                               | 2     | 0.062893082 | 0.01385085  | WNT2, WNT16                     |
| GOTERM_BP_DIRECT | GO:0021527, spinal cord association neuron differentiation                             | 2     | 0.062893082 | 0.01385085  | WNT1, WNT3A                     |
| GOTERM_BP_DIRECT | GO:0001701, in utero embryonic development                                             | 3     | 0.094339623 | 0.016787196 | WNT7B, WNT3A, WNT9B             |
| GOTERM_BP_DIRECT | GO:0050768, negative regulation of neurogenesis                                        | 2     | 0.062893082 | 0.017021368 | WNT3A, WNT7A                    |
| GOTERM_BP_DIRECT | GO:0035567, non-canonical Wnt signaling pathway                                        | 2     | 0.062893082 | 0.018076066 | WNT5A, WNT7A                    |
| GOTERM_BP_DIRECT | GO:0045944, positive regulation of transcription from RNA polymerase II promoter       | 5     | 0.157232704 | 0.018348782 | WNT5A, WNT2, WNT1, WNT3A, WNT7A |
| GOTERM_BP_DIRECT | GO:0036342, post-anal tail morphogenesis                                               | 2     | 0.062893082 | 0.019129695 | WNT5A, WNT3A                    |
| GOTERM_BP_DIRECT | GO:0030325, adrenal gland development                                                  | 2     | 0.062893082 | 0.020182257 | WNT4, WNT11                     |
| GOTERM_BP_DIRECT | GO:0002053, positive regulation of mesenchymal cell proliferation                      | 2     | 0.062893082 | 0.027520373 | WNT5A, WNT2                     |
| GOTERM_BP_DIRECT | GO:0035116, embryonic hindlimb morphogenesis                                           | 2     | 0.062893082 | 0.029607425 | WNT3, WNT7A                     |

Table SII. Continued.

| Category         | Term                                                               | Count | %           | P-value      | Genes                                                                                                                            |
|------------------|--------------------------------------------------------------------|-------|-------------|--------------|----------------------------------------------------------------------------------------------------------------------------------|
| GOTERM_BP_DIRECT | GO:0048706, embryonic skeletal system development                  | 2     | 0.062893082 | 0.031690247  | WNT5A, WNT11                                                                                                                     |
| GOTERM_BP_DIRECT | GO:0030501, positive regulation of bone mineralization             | 2     | 0.062893082 | 0.036878844  | WNT4, WNT10B                                                                                                                     |
| GOTERM_BP_DIRECT | GO:0007257, activation of JUN kinase activity                      | 2     | 0.062893082 | 0.039979387  | WNT5A, WNT7B                                                                                                                     |
| GOTERM_BP_DIRECT | GO:0007223, Wnt signaling pathway, calcium modulating pathway      | 2     | 0.062893082 | 0.041010804  | WNT5A, WNT11                                                                                                                     |
| GOTERM_BP_DIRECT | GO:0051496, positive regulation of stress fiber assembly           | 2     | 0.062893082 | 0.044098781  | WNT4, WNT11                                                                                                                      |
| GOTERM_BP_DIRECT | GO:0034613, cellular protein localization                          | 2     | 0.062893082 | 0.045126018  | WNT5A, WNT3A                                                                                                                     |
| GOTERM_BP_DIRECT | GO:0030514, negative regulation of BMP signaling pathway           | 2     | 0.062893082 | 0.047177366  | WNT5A, WNT1                                                                                                                      |
| GOTERM_BP_DIRECT | GO:0010595, positive regulation of endothelial cell migration      | 2     | 0.062893082 | 0.048201478  | WNT5A, WNT7A                                                                                                                     |
| GOTERM_BP_DIRECT | GO:0042472, inner ear morphogenesis                                | 2     | 0.062893082 | 0.054324354  | WNT1, WNT3A                                                                                                                      |
| GOTERM_BP_DIRECT | GO:0060548, negative regulation of cell death                      | 2     | 0.062893082 | 0.057371823  | WNT16, WNT11                                                                                                                     |
| GOTERM_BP_DIRECT | GO:0042733, embryonic digit morphogenesis                          | 2     | 0.062893082 | 0.058385583  | WNT5A, WNT7A                                                                                                                     |
| GOTERM_BP_DIRECT | GO:0050680, negative regulation of epithelial cell proliferation   | 2     | 0.062893082 | 0.058385583  | WNT5A, WNT10B                                                                                                                    |
| GOTERM_BP_DIRECT | GO:0032092, positive regulation of protein binding                 | 2     | 0.062893082 | 0.063438959  | WNT5A, WNT3A                                                                                                                     |
| GOTERM_BP_DIRECT | GO:0001947, heart looping                                          | 2     | 0.062893082 | 0.063438959  | WNT5A, WNT3A                                                                                                                     |
| GOTERM_BP_DIRECT | GO:0000902, cell morphogenesis                                     | 2     | 0.062893082 | 0.0644446555 | WNT3, WNT8A                                                                                                                      |
| GOTERM_BP_DIRECT | GO:0046330, positive regulation of JNK cascade                     | 2     | 0.062893082 | 0.067463206  | WNT16, WNT7A                                                                                                                     |
| GOTERM_BP_DIRECT | GO:0001938, positive regulation of endothelial cell proliferation  | 2     | 0.062893082 | 0.071471118  | WNT5A, WNT2                                                                                                                      |
| GOTERM_BP_DIRECT | GO:0033138, positive regulation of peptidyl-serine phosphorylation | 2     | 0.062893082 | 0.072470551  | WNT5A, WNT3A                                                                                                                     |
| GOTERM_BP_DIRECT | GO:0030216, keratinocyte differentiation                           | 2     | 0.062893082 | 0.078445847  | WNT5A, WNT16                                                                                                                     |
| GOTERM_BP_DIRECT | GO:0042060, wound healing                                          | 2     | 0.062893082 | 0.08240916   | WNT5A, WNT5B                                                                                                                     |
| GOTERM_BP_DIRECT | GO:0043066, negative regulation of apoptotic process               | 3     | 0.094339623 | 0.084262975  | WNT5A, WNT11, WNT7A                                                                                                              |
| GOTERM_BP_DIRECT | GO:0032355, response to estradiol                                  | 2     | 0.062893082 | 0.09322543   | WNT7A, WNT8B                                                                                                                     |
| GOTERM_BP_DIRECT | GO:0030336, negative regulation of cell migration                  | 2     | 0.062893082 | 0.097128678  | WNT4, WNT11                                                                                                                      |
| GOTERM_BP_DIRECT | GO:0045892, negative regulation of transcription, DNA-templated    | 3     | 0.094339623 | 0.098625276  | WNT5A, WNT4, WNT11                                                                                                               |
| GOTERM_CC_DIRECT | GO:0005578, proteinaceous extracellular matrix                     | 19    | 0.597484277 | 5.82E-34     | WNT5A, WNT10A, WNT16, WNT10B, WNT5B, WNT3A, WNT2B, WNT2, WNT1, WNT7B, WNT4, WNT3, WNT9B, WNT11, WNT9A, WNT6, WNT7A, WNT8A, WNT8B |
| GOTERM_CC_DIRECT | GO:0005615, extracellular space                                    | 19    | 0.597484277 | 3.90E-21     | WNT5A, WNT10A, WNT16, WNT10B, WNT5B, WNT3A, WNT2B, WNT2, WNT1, WNT7B, WNT4, WNT3, WNT9B, WNT11, WNT9A, WNT6, WNT7A, WNT8A, WNT8B |

Table SII. Continued.

| Category         | Term                                                    | Count | %           | P-value     | Genes                                                                                                                            |
|------------------|---------------------------------------------------------|-------|-------------|-------------|----------------------------------------------------------------------------------------------------------------------------------|
| GOTERM_CC_DIRECT | GO:0005576, extracellular region                        | 19    | 0.597484277 | 9.85E-20    | WNT5A, WNT10A, WNT16, WNT10B, WNT5B, WNT3A, WNT2B, WNT2, WNT1, WNT7B, WNT4, WNT3, WNT9B, WNT11, WNT9A, WNT6, WNT7A, WNT8A, WNT8B |
| GOTERM_CC_DIRECT | GO:0030666, endocytic vesicle membrane                  | 9     | 0.283018868 | 8.08E-16    | WNT5A, WNT1, WNT7B, WNT4, WNT3, WNT5B, WNT3A, WNT6, WNT7A                                                                        |
| GOTERM_CC_DIRECT | GO:0005796, Golgi lumen                                 | 9     | 0.283018868 | 1.85E-14    | WNT5A, WNT1, WNT7B, WNT4, WNT3, WNT5B, WNT3A, WNT6, WNT7A                                                                        |
| GOTERM_CC_DIRECT | GO:0005788, endoplasmic reticulum lumen                 | 9     | 0.283018868 | 5.24E-12    | WNT5A, WNT1, WNT7B, WNT4, WNT3, WNT5B, WNT3A, WNT6, WNT7A                                                                        |
| GOTERM_CC_DIRECT | GO:0009986, cell surface                                | 7     | 0.220125786 | 9.21E-06    | WNT5A, WNT1, WNT4, WNT5B, WNT3A, WNT6, WNT7A                                                                                     |
| GOTERM_CC_DIRECT | GO:0070062, extracellular exosome                       | 10    | 0.314465409 | 6.28E-04    | WNT5A, WNT1, WNT7B, WNT4, WNT3, WNT5B, WNT3A, WNT9A, WNT6, WNT7A                                                                 |
| GOTERM_CC_DIRECT | GO:0005886, plasma membrane                             | 10    | 0.314465409 | 0.009916722 | WNT5A, WNT2, WNT1, WNT7B, WNT4, WNT3, WNT3, WNT5B, WNT3A, WNT6, WNT7A                                                            |
| GOTERM_CC_DIRECT | GO:1990909, Wnt signalosome                             | 2     | 0.062893082 | 0.010814249 | WNT2, WNT3                                                                                                                       |
| GOTERM_CC_DIRECT | GO:0098793, presynapse                                  | 2     | 0.062893082 | 0.061389051 | WNT3A, WNT7A                                                                                                                     |
| GOTERM_MF_DIRECT | GO:0005109, frizzled binding                            | 19    | 0.597484277 | 4.73E-51    | WNT5A, WNT10A, WNT16, WNT10B, WNT5B, WNT3A, WNT2B, WNT2, WNT1, WNT7B, WNT4, WNT3, WNT9B, WNT11, WNT9A, WNT6, WNT7A, WNT8A, WNT8B |
| GOTERM_MF_DIRECT | GO:0048018, receptor agonist activity                   | 9     | 0.283018868 | 3.43E-21    | WNT5A, WNT2, WNT1, WNT4, WNT10B, WNT3, WNT3A, WNT7A, WNT8A                                                                       |
| GOTERM_MF_DIRECT | GO:0005125, cytokine activity                           | 4     | 0.125786164 | 8.10E-04    | WNT5A, WNT2, WNT1, WNT7A                                                                                                         |
| GOTERM_MF_DIRECT | GO:0019904, protein domain specific binding             | 4     | 0.125786164 | 0.001312497 | WNT5A, WNT1, WNT3, WNT3A                                                                                                         |
| GOTERM_MF_DIRECT | GO:0005110, frizzled-2 binding                          | 2     | 0.062893082 | 0.002131501 | WNT5A, WNT3A                                                                                                                     |
| GOTERM_MF_DIRECT | GO:0039706, co-receptor binding                         | 2     | 0.062893082 | 0.010614673 | WNT3A, WNT9B                                                                                                                     |
| GOTERM_MF_DIRECT | GO:0044212, transcription regulatory region DNA binding | 3     | 0.094339623 | 0.021228971 | WNT5A, WNT1, WNT11                                                                                                               |
| GOTERM_MF_DIRECT | GO:0005102, receptor binding                            | 3     | 0.094339623 | 0.053518524 | WNT5B, WNT3A, WNT7A                                                                                                              |

BP, biological process; CC, cellular component; MF, molecular function.



Table SIII. Kyoto Encyclopedia of Genes and Genomes (KEGG) pathways of WNT family genes.

| Category     | Term                                                               | Count | %        | P-value  | Genes                                                                                                                            |
|--------------|--------------------------------------------------------------------|-------|----------|----------|----------------------------------------------------------------------------------------------------------------------------------|
| KEGG_PATHWAY | hsa05217: Basal cell carcinoma                                     | 19    | 0.597484 | 7.31E-40 | WNT5A, WNT10A, WNT16, WNT10B, WNT5B, WNT3A, WNT2B, WNT2, WNT1, WNT7B, WNT4, WNT3, WNT9B, WNT11, WNT9A, WNT6, WNT7A, WNT8A, WNT8B |
| KEGG_PATHWAY | hsa04916: Melanogenesis                                            | 19    | 0.597484 | 1.56E-34 | WNT5A, WNT10A, WNT16, WNT10B, WNT5B, WNT3A, WNT2B, WNT2, WNT1, WNT7B, WNT4, WNT3, WNT9B, WNT11, WNT9A, WNT6, WNT7A, WNT8A, WNT8B |
| KEGG_PATHWAY | hsa04310: Wnt signaling pathway                                    | 19    | 0.597484 | 8.20E-32 | WNT5A, WNT10A, WNT16, WNT10B, WNT5B, WNT3A, WNT2B, WNT2, WNT1, WNT7B, WNT4, WNT3, WNT9B, WNT11, WNT9A, WNT6, WNT7A, WNT8A, WNT8B |
| KEGG_PATHWAY | hsa04550: Signaling pathways regulating pluripotency of stem cells | 19    | 0.597484 | 1.08E-31 | WNT5A, WNT10A, WNT16, WNT10B, WNT5B, WNT3A, WNT2B, WNT2, WNT1, WNT7B, WNT4, WNT3, WNT9B, WNT11, WNT9A, WNT6, WNT7A, WNT8A, WNT8B |
| KEGG_PATHWAY | hsa04390: Hippo signaling pathway                                  | 19    | 0.597484 | 4.60E-31 | WNT5A, WNT10A, WNT16, WNT10B, WNT5B, WNT3A, WNT2B, WNT2, WNT1, WNT7B, WNT4, WNT3, WNT9B, WNT11, WNT9A, WNT6, WNT7A, WNT8A, WNT8B |
| KEGG_PATHWAY | hsa05205: Proteoglycans in cancer                                  | 19    | 0.597484 | 9.44E-29 | WNT5A, WNT10A, WNT16, WNT10B, WNT5B, WNT3A, WNT2B, WNT2, WNT1, WNT7B, WNT4, WNT3, WNT9B, WNT11, WNT9A, WNT6, WNT7A, WNT8A, WNT8B |
| KEGG_PATHWAY | hsa05166: HTLV-I infection                                         | 19    | 0.597484 | 9.59E-27 | WNT5A, WNT10A, WNT16, WNT10B, WNT5B, WNT3A, WNT2B, WNT2, WNT1, WNT7B, WNT4, WNT3, WNT9B, WNT11, WNT9A, WNT6, WNT7A, WNT8A, WNT8B |
| KEGG_PATHWAY | hsa05200: Pathways in cancer                                       | 19    | 0.597484 | 2.67E-23 | WNT5A, WNT10A, WNT16, WNT10B, WNT5B, WNT3A, WNT2B, WNT2, WNT1, WNT7B, WNT4, WNT3, WNT9B, WNT11, WNT9A, WNT6, WNT7A, WNT8A, WNT8B |

Table SIV. Clinical characteristics of HCC patients in the TCGA cohort.

| Variables                                    | RFS                 |                  |               |                      |                     | OS               |               |                      |                     |  |
|----------------------------------------------|---------------------|------------------|---------------|----------------------|---------------------|------------------|---------------|----------------------|---------------------|--|
|                                              | Patients<br>(n=370) | No. of<br>events | MRT<br>(days) | Crude HR<br>(95% CI) | Log-rank<br>P-value | No. of<br>events | MST<br>(days) | Crude HR<br>(95% CI) | Log-rank<br>P-value |  |
| Age (years)                                  |                     |                  |               |                      |                     |                  |               |                      |                     |  |
| ≤65                                          | 232                 | 87               | 912           | 1                    | 0.81                | 73               | 2,456         | 1                    | 0.184               |  |
| >65                                          | 138                 | 52               | 828           | 1.043 (0.739-1.472)  |                     | 57               | 1,423         | 1.265 (0.893-1.791)  |                     |  |
| Sex                                          |                     |                  |               |                      |                     |                  |               |                      |                     |  |
| Female                                       | 121                 | 45               | 893           | 1                    | 0.919               | 51               | 1,490         | 1                    | 0.261               |  |
| Male                                         | 249                 | 94               | 875           | 0.982 (0.688-1.401)  |                     | 79               | 2,486         | 0.817 (0.573-1.164)  |                     |  |
| BMI <sup>a</sup>                             |                     |                  |               |                      |                     |                  |               |                      |                     |  |
| ≤28                                          | 240                 | 86               | 903           | 1                    | 0.909               | 83               | 2,131         | 1                    | 0.363               |  |
| >28                                          | 94                  | 38               | 879           | 0.978 (0.666-1.435)  |                     | 29               | 2,116         | 0.821 (0.537-1.257)  |                     |  |
| Alcohol consumption <sup>b</sup>             |                     |                  |               |                      |                     |                  |               |                      |                     |  |
| No                                           | 234                 | 85               | 912           | 1                    | 0.665               | 84               | 1,694         | 1                    | 0.896               |  |
| Yes                                          | 117                 | 46               | 879           | 1.083 (0.756-1.552)  |                     | 40               | 1,624         | 1.026 (0.703-1.496)  |                     |  |
| Ishak fibrosis score <sup>c</sup>            |                     |                  |               |                      |                     |                  |               |                      |                     |  |
| 0-No Fibrosis                                | 74                  | 30               | 893           | 1                    | 0.931               | 30               | 2,131         | 1                    | 0.872               |  |
| 1-2-Portal fibrosis                          | 31                  | 11               | 754           | 0.866 (0.432-1.736)  |                     | 9                | 1,372         | 0.917 (0.429-1.962)  |                     |  |
| 3,4-Fibrous septa                            | 28                  | 11               | 828           | 1.050 (0.526-2.097)  |                     | 6                | NA            | 0.682 (0.281-1.654)  |                     |  |
| 5-Nodular formation and incomplete cirrhosis | 9                   | 3                | 1,432         | 0.789 (0.240-2.591)  |                     | 2                | 1,386         | 0.750 (0.177-3.167)  |                     |  |
| 6-Established cirrhosis                      | 69                  | 30               | 776           | 1.134 (0.683-1.884)  |                     | 17               | NA            | 0.766 (0.418-1.403)  |                     |  |
| Tumor stage <sup>d</sup>                     |                     |                  |               |                      | <0.0001             |                  |               |                      | <0.0001             |  |
| I                                            | 171                 | 45               | 1,509         | 1                    |                     | 42               | 2,532         | 1                    |                     |  |
| II                                           | 85                  | 34               | 754           | 1.914 (1.225-2.989)  |                     | 26               | 1,852         | 1.427 (0.874-2.330)  |                     |  |
| III+IV                                       | 90                  | 49               | 289           | 3.640 (2.416-5.486)  |                     | 48               | 770           | 2.764 (1.823-4.190)  |                     |  |
| Histological grade <sup>e</sup>              |                     |                  |               |                      |                     |                  |               |                      |                     |  |
| G1                                           | 55                  | 21               | 990           | 1                    | 0.649               | 18               | 2,116         | 1                    | 0.748               |  |
| G2                                           | 177                 | 64               | 754           | 1.218 (0.744-1.997)  |                     | 60               | 1,685         | 1.181 (0.697-2.000)  |                     |  |
| G3                                           | 121                 | 48               | 828           | 1.249 (0.748-2.087)  |                     | 43               | 1,622         | 1.233 (0.711-2.140)  |                     |  |
| G4                                           | 12                  | 2                | NA            | 0.623 (0.146-2.659)  |                     | 5                | NA            | 1.693 (0.626-4.584)  |                     |  |
| Serum AFP <sup>f</sup> , ng/ml               |                     |                  |               |                      |                     |                  |               |                      |                     |  |
| ≤400                                         | 213                 | 77               | 912           | 1                    | 0.788               | 62               | 2,456         | 1                    | 0.832               |  |
| >400                                         | 64                  | 21               | 1,509         | 0.936 (0.576-1.520)  |                     | 22               | 2,486         | 1.055 (0.645-1.724)  |                     |  |
| Radical resection <sup>g</sup>               |                     |                  |               |                      |                     |                  |               |                      |                     |  |
| R0                                           | 323                 | 121              | 912           | 1                    | 0.011               | 110              | 1,852         | 1                    | 0.006               |  |
| R1+R2+RX                                     | 40                  | 17               | 478           | 1.916 (1.149-3.193)  |                     | 17               | 837           | 2.030 (1.213-3.395)  |                     |  |

Table SIV. Continued.

| Variables                           | Patients<br>(n=370) | RFS              |               |                      |                     | OS               |               |                      |                     |
|-------------------------------------|---------------------|------------------|---------------|----------------------|---------------------|------------------|---------------|----------------------|---------------------|
|                                     |                     | No. of<br>events | MRT<br>(days) | Crude HR<br>(95% CI) | Log-rank<br>P-value | No. of<br>events | MST<br>(days) | Crude HR<br>(95% CI) | Log-rank<br>P-value |
| Microvascular invasion <sup>b</sup> |                     |                  |               |                      |                     |                  |               |                      |                     |
| No                                  | 206                 | 64               | 1,279         | 1                    | 0.028               | 60               | 2,131         | 1                    | 0.154               |
| Yes                                 | 108                 | 43               | 644           | 1.540 (1.045-2.268)  |                     | 36               | 2,486         | 1.351 (0.892-2.047)  |                     |
| Child-Pugh score <sup>i</sup>       |                     |                  |               |                      | 0.242               |                  |               |                      | 0.18                |
| A                                   | 216                 | 83               | 990           | 1                    |                     | 59               | 2,542         | 1                    |                     |
| B+C                                 | 22                  | 8                | 1,286         | 1.542 (0.742-3.204)  |                     | 9                | 1,005         | 1.614 (0.796-3.270)  |                     |

<sup>a</sup>Information on BMI was unavailable in 36 patients. <sup>b</sup>Information on alcohol consumption was unavailable in 19 patients. <sup>c</sup>Information on Ishak fibrosis score was unavailable in 159 patients. <sup>d</sup>Information on tumor stage was unavailable in 24 patients; <sup>e</sup>Information on histological grade was unavailable in 5 patients. <sup>f</sup>Information on serum AFP was unavailable in 93 patients. <sup>g</sup>Information on radical resection was unavailable in 7 patients. <sup>h</sup>Information on microvascular invasion was unavailable in 56 patients. <sup>i</sup>Information on Child-Pugh score was unavailable in 132 patients. HCC, hepatocellular carcinoma; TCGA, The Cancer Genome Atlas; RFS, recurrence-free survival; OS, overall survival; HR, hazard ratio; 95% CI, 95% confidence interval; BCLC, Barcelona Clinic Liver Cancer; MRT, median recurrence time; MST, median survival time; BMI, body mass index; AFP,  $\alpha$ -fetoprotein.
